# Supplementary material for: Bruno-3 regulates sarcomere component expression and contributes to muscle phenotypes of myotonic dystrophy type 1
Source: PubMed Central journal article supplement (PMC5992612; doi:10.1242/dmm.031849), 2018-05-21
Supplement: dmm-11-031849-s1.pdf [file dmm-11-031849-s1.pdf]

## SUPPLEMENTAL TABLES

Table S1 – Genes deleted in *Df(bru-3)* deletion in addition to *bru-3*

[Click here to Download Table S1](#)

Table S2 – Up and down-regulated genes by *bru-3* overexpression

[Click here to Download Table S2](#)

Table S3 – Random and destabilizing hexamers enrichment in 3'-UTR sequences of CLIP positive transcripts vs all genomic transcripts

[Click here to Download Table S3](#)

Table S4 – primers used for qPCR on larval samples

[Click here to Download Table S4](#)

Table S5 – Primers used for qPCR on C2C12 myotubes

[Click here to Download Table S5](#)



**Figure S1. Evidences supporting *bru-3* as *Celf1* orthologue in larval muscles. (A)**

Sequence alignment of human CELFs lsm motifs with Brunos lsm motifs. lsm consensus sequence was extracted from Delaunay et al., 2004. (B) Immunostaining of Arrest in larval muscles. Scale-bars represent 25  $\mu\text{m}$ . (C) Immunostaining of Arrest in adult abdominal muscles. Scale-bars represent 10  $\mu\text{m}$ . On these pictures, the rabbit anti-Arrest antibody was used (1:250, F. Schnorrer). (D) qRT-PCR analysis of *bru-3* transcript levels in control (*Mef>lacZ*), *Mef>bru-3(37)* and *Mef>960CTG* conditions. (E) Western blot analysis of Bru-3 protein expression in nuclear and cytoplasmic fractions isolated from muscle-enriched dissected *Mef>lacZ* 3<sup>rd</sup> instar larvae (left WB) and in IAA-treated cytoplasmic fractions isolated from *Mef>lacZ*, *Mef>bru-3(37)*, *Mef>960CTG* and *Mef>960CTG; Df(bru-3)*. Anti-Lbe antibody detecting nuclear only protein Lbe is used as quality control for nuclear *versus* cytoplasmic fractions. Anti-Actin is used as loading control in the left WB panel. Note that about 10 times more of protein extract was loaded to detect nuclear Bru-3 protein (compare intensity of Actin bands). Because Bru-3 overexpression could potentially impact on muscle protein levels including sarcomeric Actin we opted to use Coomassie blue staining as loading control when using different genetic contexts influencing Bru-3 expression (right WB panel).

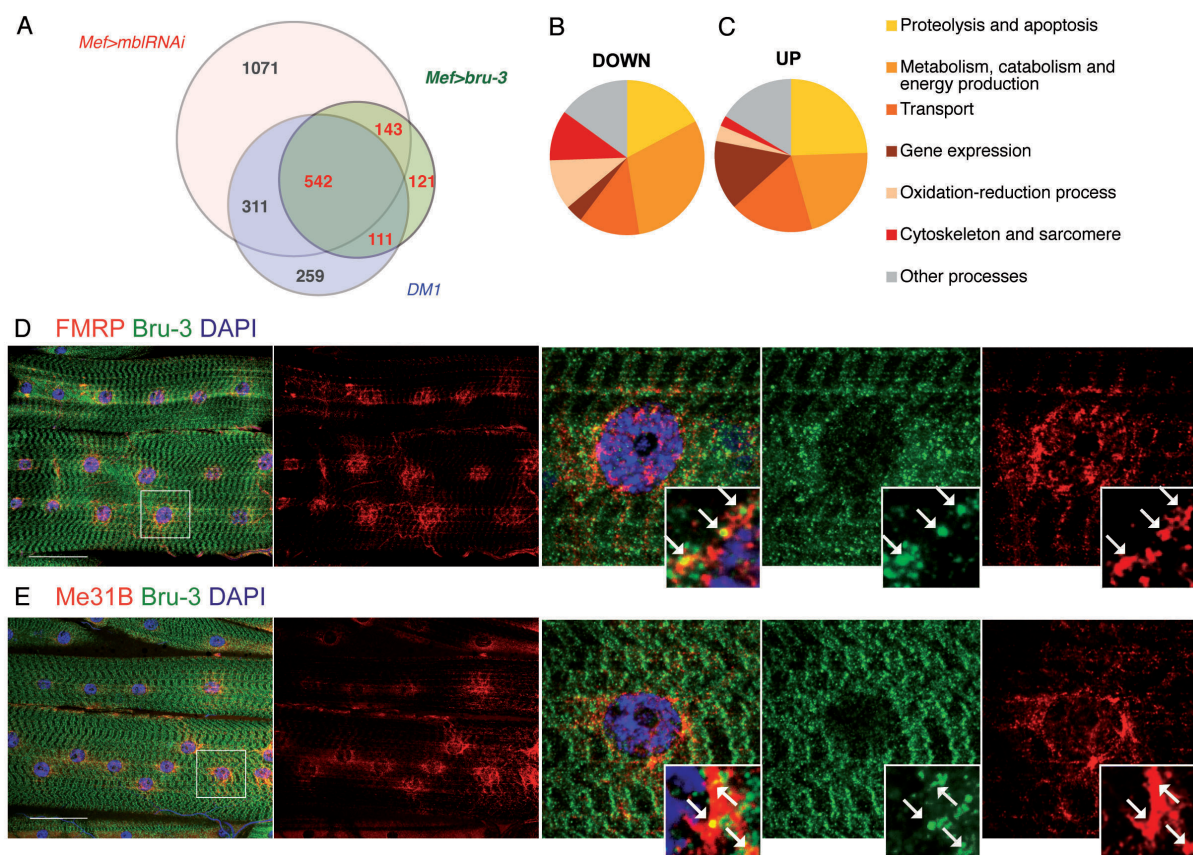

**Figure S2. Global gene expression analysis of *bru-3* overexpression suggests a cytoplasmic function of Bru-3 in regulating sarcomeric transcript accumulation in P-bodies.** (A) Venn diagrams of genes upregulated in *Mef>bru-3(37)* condition vs. *Mef>mbIRNAi* and DM1 (*Mef>960CTG*∩*Mef>600CTG*) lines shows that about 90% of transcriptomic alterations caused by Bru-3 overexpression are common to DM1 and/or *mbI*-attenuated lines. The diagram was generated from a list of transcripts that are >1.5-fold enriched or depleted relative to the *Mef>lacZ* reference. (B-C) Pie chart recapping the Gene Ontology-based biological process distribution of downregulated (B) and upregulated (C) genes on the *Mef>bru-3(37)* microarray. Genes of unknown biological process and molecular function were not taken into account in these charts ( $n_{down} = 101$ ;  $n_{up}=99$ ). (D-E) P-body markers FMRP (D) and Me31B (E) are expressed around the DAPI-stained nuclei (blue) in muscle fibers and partially co-localize with Bru-3 (arrows). Scale bar 60 μm.

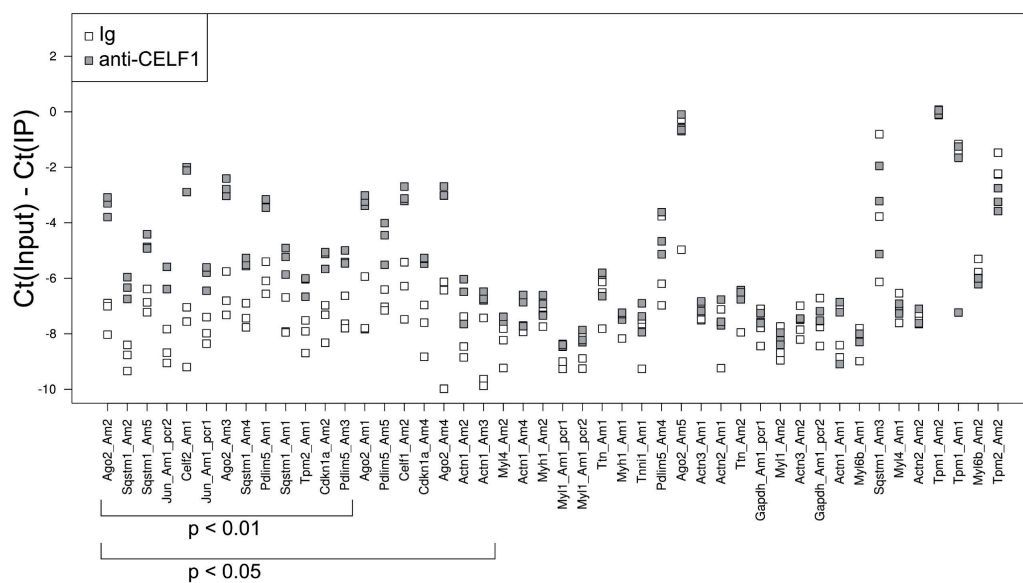

**Figure S3. CELF1 can bind sarcomeric transcripts in C2C12 myotubes** Results of CLIP experiments for all primer pairs tested.
